Running Head: MATERIAL PROPERTY EXPECTATION

1 Unmet Expectations About Material Properties  
2 Delay Perceptual Decisions

3 Amna Malik<sup>1,2</sup>, Katja Doerschner<sup>2,4</sup>, and Huseyin Boyaci<sup>1,2,3,4,\*</sup>

4 <sup>1</sup>Interdisciplinary Neuroscience Program, Bilkent University, Ankara, 06800, Turkey

5 <sup>2</sup>Aysel Sabuncu Brain Research Center & National Magnetic Resonance Research Center  
6 (UMRAM), Bilkent University, Ankara, 06800, Turkey

7 <sup>3</sup>Department of Psychology, Bilkent University, Ankara, 06800, Turkey

8 <sup>4</sup>Department of Psychology, Justus Liebig University Giessen, Giessen, Germany

9 \*Corresponding author, [hboyaci@bilkent.edu.tr](mailto:hboyaci@bilkent.edu.tr)

10 July 28, 2022

## MATERIAL PROPERTY EXPECTATION

### Abstract

Based on our expectations about material properties we can implicitly predict an object's future states, e.g. a wine glass falling down will break when it hits the ground. How these expectations affect relatively low level perceptual decisions, however, has not been systematically studied previously. To seek an answer to this question we conducted a behavioral experiment using animations of various familiar objects (e.g. key, wine glass etc.) freely falling and hitting the ground. During a training session participants first built expectations about the dynamic properties of those objects. Half of the participants (N=28) built expectations consistent with our daily lives (e.g. a key bounces rigidly), whereas the other half learned an anomalous behavior (e.g. a key wobbles). This was followed by experimental sessions, in which expectations were unmet in 20% of the trials. In both training and experimental sessions, participants' task was to report whether the objects broke or not upon hitting the ground. Critically a specific object always remained intact or broke, only the manner with which it did so differed. For example, a key could wobble or remain rigid, but it never broke. We found that participants' reaction times were longer when expectations were unmet even when those expectations were anomalous and learned during the training session. Furthermore, we found an interplay between long-term and newly learned expectations, which could be predicted by a Bayesian updating approach. Overall, our results show that expectations about material properties can have an impact on relatively low-level perceptual decision making processes.

*Keywords:* expectation, dynamic material properties, perceptual decisions

## MATERIAL PROPERTY EXPECTATION

# Unmet Expectations About Material Properties Delay

## Perceptual Decisions

### Introduction

Objects are made of certain materials that determine their physical properties. Through the lifetime of experiences, our brain forms long term expectations about the associations between objects and these physical properties (Buckingham, Cant, & Goodale, 2009; Fleming, Wiebel, & Gegenfurtner, 2013). Based on these learned associations, we can predict future states of objects under different forces (Alley, Schmid, & Doerschner, 2020). For instance, when we hold a tea cup in our hand we will be careful not to drop it because we can predict what happens if it falls to the ground. On the other hand, we would not worry a lot if we slip a piece of cloth from the grip of our hand. These expectations are believed to influence behavior through top-down processes and they may often be implicit (Alley et al., 2020; Kersten, Mamassian, & Yuille, 2004; Kveraga, Avniel, & Bar, 2007). Indeed we become aware of our expectations only when we encounter a situation in which they are unmet, or violated, as shown in Figure 1.

Here we study the effect of long term and newly acquired, context-dependent expectations about material properties on the speed of relatively low level perceptual decisions. A great number of studies have shown that observers perceive the expected stimuli faster (Stein & Peelen, 2015; Summerfield & de Lange, 2014; Wyart, Nobre, & Summerfield, 2012). Those studies, however, usually focused on identification of static stimuli. Only a few studies tested the effects of expectations about

## MATERIAL PROPERTY EXPECTATION

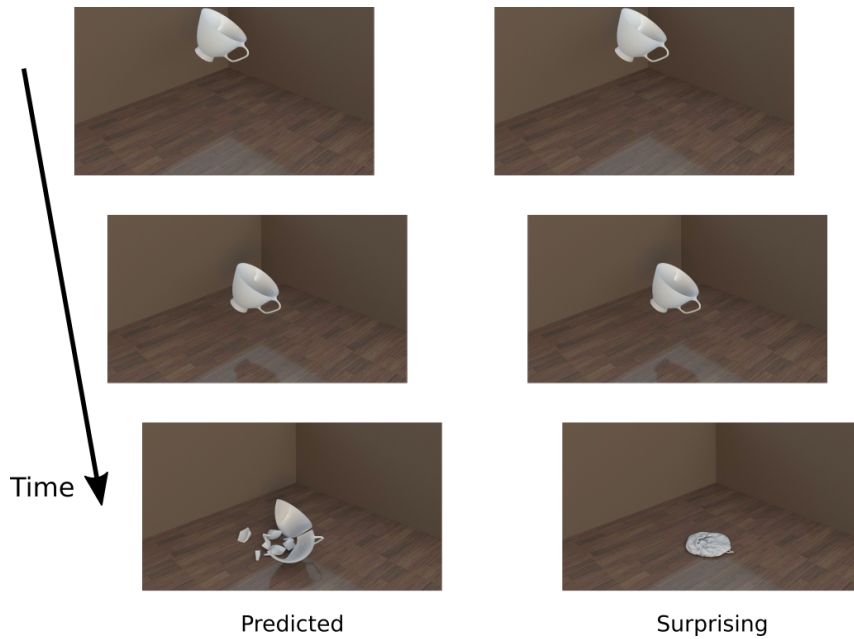

Figure 1: As soon as you see a teacup start falling down, your visual system predicts the future. If not caught, the cup will hit the ground and shatter. But instead if the cup unnaturally wrinkles as a piece of cloth upon hitting the ground, you get surprised and even amazed. Because here your expectations and the visual input mismatch (Alley et al., 2020).

57 material properties in dynamic scenes (Alley et al., 2020). In their study Alley et  
58 al. presented participants computer animations of objects that are falling down and  
59 behaving in a predicted or surprising way upon hitting the ground. For example a  
60 teacup could shatter as predicted or, surprisingly, wrinkle as a piece of cloth. The  
61 task of the observers was to judge as quickly and as accurately as possible one of four  
62 high-level attributes of the objects in each trial, which were hardness, gelatinous-  
63 ness, heaviness, and liquidity. Alley et al. found that long term expectations bias  
64 the perception of high-level material attributes of familiar objects. For example, a  
65 spoon that wrinkles upon impact is judged harder than a piece of cloth that also  
66 wrinkles. Further, they showed that the reaction times were longer in the surpris-  
67 ing trials. In the current study we use a paradigm similar to that in Alley et al.  
68 We present the observers computer animations of familiar objects falling down and  
69 behaving in a predicted or surprising way upon hitting the ground. To target rela-

## MATERIAL PROPERTY EXPECTATION

70 tively low level perceptual decisions, however, we do not ask the observers to make  
71 judgments about high-level material attributes. Instead, our question is simply “did  
72 the object break?” Importantly, breaking objects always break and non-breaking ob-  
73 jects always remain intact upon hitting the ground in both expected and surprising  
74 conditions. Thus, the correct response for the same object, whether surprising or  
75 predicted, does not change, eliminating a response preparation confound. With this  
76 paradigm and through measuring the reaction times (RTs), we are able to assess  
77 the effect of expectations about material properties on relatively low level perceptual  
78 decisions on motion patterns.

79 In short, our research question is whether expectations about material prop-  
80 erties affect low level perceptual decisions. We hypothesize that if they do, then  
81 RTs should be different under the predicted and surprising conditions (pre-planned  
82 test). To anticipate, under two different experimental manipulations and with two  
83 groups of participants, we found that RTs are indeed longer for the surprising tri-  
84 als. Further, we found an interesting interplay between long term expectations and  
85 context-dependent regularities, for which we propose possible explanations.

## 86 **Materials and Methods**

### 87 **Participants**

88 Twenty eight participants participated in the experiment. All had normal or  
89 corrected to normal vision, and were naive to the purposes of the experiment. Par-  
90 ticipants gave their written informed consent before the first experimental session, in  
91 line with the guidelines by the Declaration of Helsinki. Experimental protocols and

## MATERIAL PROPERTY EXPECTATION

92 procedures were approved by the Research Ethics Committee of Bilkent University,  
93 Turkey.

### 94 **Stimuli presentation**

95 An LCD color reference monitor (Eizo CG2730, 27 inches, 2560 x 1440 resolution,  
96 refresh rate 60 Hz) was used for stimulus presentation. The monitor was the only  
97 source of light in an otherwise completely dark room, where the experiment took  
98 place. Participants sat on a chair and viewed the monitor from a distance of 60 cm.  
99 A chin rest was used to minimize the head movements. Experimental paradigm was  
100 programmed with Psychtoolbox on MATLAB, version 2018a (Brainard, 1997).

101 Stimuli were generated by a professional graphic artist (Aleksa Radakovic) using  
102 Cinema 4d, and consisted of computer animations of six objects that act in a certain  
103 way when dropped on the ground; three of them break upon hitting the ground  
104 (breaking objects: wine glass, pot and teacup) and the other three do not break  
105 (non-breaking objects: spoon, key and rod). Each animation consisted of 46 frames.  
106 There were two animations for each object. In one set of animations objects behaved  
107 in a natural way upon hitting the ground. Specifically, breaking objects shattered  
108 and non-breaking objects bounced rigidly after they hit the ground. In the other  
109 set, objects behaved in an anomalous way upon hitting the ground: breaking objects  
110 grveled, non-breaking objects wobbled. Figure 2 shows examples of these natural  
111 and anomalous behaviors.

## MATERIAL PROPERTY EXPECTATION

| Stimuli                     | Objects                                                                                         | Natural behavior                                                                              | Anomalous behavior                                                                              |
|-----------------------------|-------------------------------------------------------------------------------------------------|-----------------------------------------------------------------------------------------------|-------------------------------------------------------------------------------------------------|
| <b>Breaking Objects</b>     | <br>wine glass | <br>shatter  | <br>gravel   |
|                             | <br>pot        | <br>shatter  | <br>gravel   |
|                             | <br>teacup    | <br>shatter | <br>gravel  |
| <b>Non-breaking Objects</b> | <br>spoon    | <br>rigid  | <br>wobble |
|                             | <br>key      | <br>rigid  | <br>wobble |
|                             | <br>rod      | <br>rigid  | <br>wobble |

Figure 2: Six objects used as stimuli and their natural and anomalous behaviors. For the participants in group-1 natural behavior was predicted, anomalous behavior was surprising. For the participants in group-2 anomalous behavior was predicted, natural behavior was surprising. These expectations were formed through a training session before the main experiment.

## MATERIAL PROPERTY EXPECTATION

### 112 **Experimental Design**

113 Participants were divided into two groups. Each participant underwent a train-  
114 ing session followed by an experimental session. During the training session, par-  
115 ticipants in group-1 were presented with animations where objects behaved natu-  
116 rally, whereas participants in group-2 were presented with animations where objects  
117 behaved anomalously (20 trials for each object). Thus, the context-dependent ex-  
118 pectations formed for group-2 was different than long-term expectations. During  
119 the experimental session 10 animations were shown for each object. Of those 10, 8  
120 were the same as in the training session (for group-1 natural, for group-2 anomalous  
121 behavior). We call these predicted trials. The remaining 2 trials were from the  
122 untrained category (for group-1 anomalous, for group-2 natural behavior). We call  
123 these surprising trials. Order of presentation was randomized in all sessions.

124 All sessions started with an instruction screen, followed by the animations as  
125 soon as any key is pressed. Animations were preceded by a 1-second blank screen  
126 with a central fixation cross. Each animation was 1.53 seconds long (46 frames, 30  
127 frames per second). The task was to answer the question, “Did the object break?”  
128 by pressing the corresponding keys for “yes” and “no” on the keyboard, after the  
129 object hits the ground. In the training session, an error sound was delivered if the  
130 participant answered the question before the object hit the ground. Reaction times  
131 were measured from the time object makes an impact on the ground (15th frame)  
132 to the time when the participant pressed a key. The next trial did not start until  
133 the observer responded.



## MATERIAL PROPERTY EXPECTATION

### 134 Analysis

135 Analyses were performed on MATLAB and JASP (JASP Team, 2022). For both  
136 the training and experimental sessions, data from trials in which reaction times  
137 are negative (a response made before the object hits the ground), or do not fall  
138 within the  $\pm 3SD$  of the mean were excluded from analyses (a total of 24 out of  
139 1680 data points excluded). For the training sessions, reaction times were analyzed  
140 using repeated measures ANOVA with “trial numbers” as the repeating factor and  
141 “group” as between subject factor. For the experimental sessions, reaction times  
142 of predicted trials for breaking and non breaking objects were averaged separately  
143 for each participant, and compared to the reaction times of surprising trials with  
144 a 3-way repeated measures ANOVA with objects (breaking and non-breaking) and  
145 conditions (predicted and surprising) as repeating factors and group as between  
146 subject factor. To answer our main research question, namely whether reaction  
147 times are longer for surprising trials compared to predicted trials, we performed  
148 pre-planned Welch’s tests. In these tests we compared the overall mean reaction  
149 times of predicted and surprising trials per group. Further, we compared the mean  
150 reaction times for predicted and surprising conditions per participant with paired  
151 sample Student’s *t*-tests. Finally, to investigate the effect of expectations specifically  
152 on breaking and non-breaking objects, we averaged reaction times separately for  
153 breaking and non breaking objects per participant. Then, we compared the mean  
154 reaction times of predicted and surprising conditions with a paired sample *t*-test  
155 (predicted breaking versus surprising breaking and predicted non-breaking versus  
156 surprising non-breaking).

## MATERIAL PROPERTY EXPECTATION

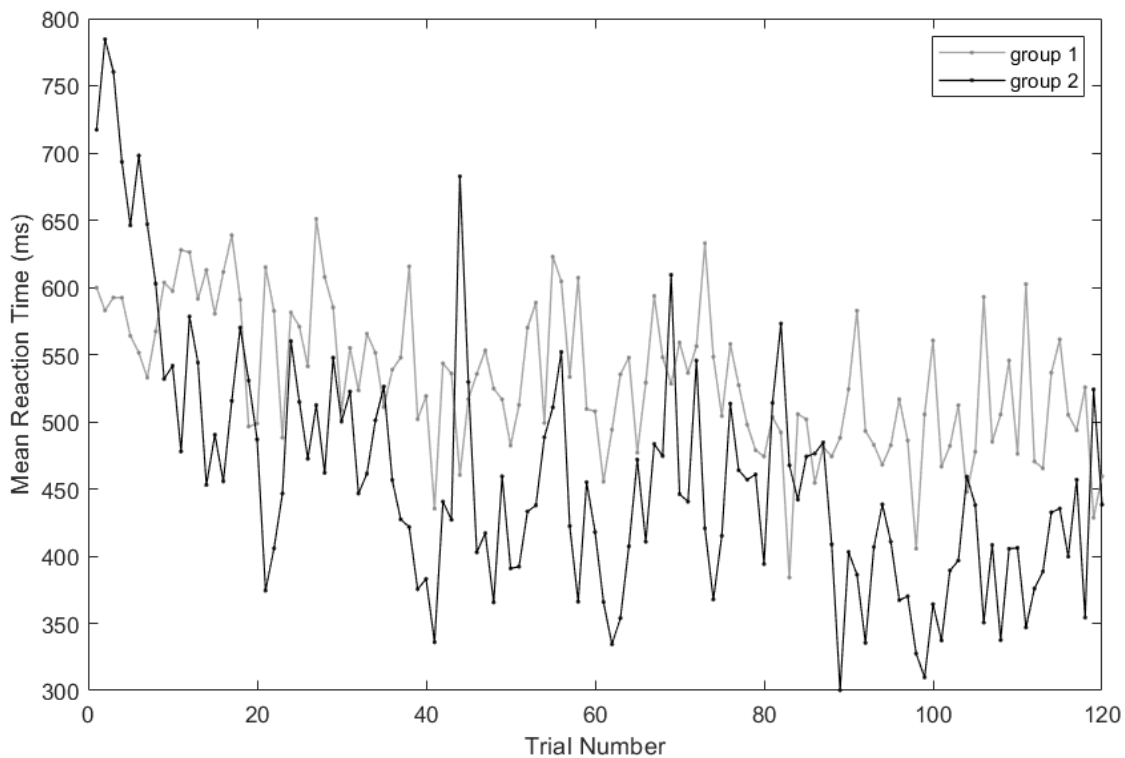

Figure 3: Reaction times (RTs) from the training session. RTs are averaged across participants at each trial number. Clearly the RTs get shorter as the session progresses. This training effect is stronger for the participants in group-2, who were trained on the anomalous behavior.

## 157 Results

158 Figure 3 shows the mean reaction times (RTs) as a variable of trial number in  
159 the training session. Repeated measure ANOVA indicated a significant main effect  
160 of trial number ( $p < 0.001$ ) and an interaction between groups and trial numbers  
161 ( $p < 0.022$ ). Inspecting the plot reveal that RTs get shorter towards the end of the  
162 session, which shows that the training was effective. Moreover, Figure 3 shows that  
163 the training effect was stronger for participants in group-2. Mean RTs of group-2  
164 were higher than group-1 in the beginning, but they reached group-1 levels and even  
165 became slightly shorter after several tens of trials and remained that way until the  
166 end of the session.

## MATERIAL PROPERTY EXPECTATION

### Within Subjects Effects

| Cases                        | Sum of Squares | Mean Square | F      | p      |
|------------------------------|----------------|-------------|--------|--------|
| conditions                   | 333979.174     | 333979.174  | 18.761 | < .001 |
| conditions x group           | 42494.206      | 42494.206   | 2.387  | 0.134  |
| objects                      | 74840.823      | 74840.823   | 6.763  | 0.015  |
| objects x group              | 148987.254     | 148987.254  | 13.463 | 0.001  |
| objects x conditions         | 75303.583      | 75303.583   | 11.599 | 0.002  |
| objects x conditions x group | 113777.593     | 113777.593  | 17.525 | < .001 |

### Between Subjects Effects

| Cases | Sum of Squares | Mean Square | F     | p     |
|-------|----------------|-------------|-------|-------|
| group | 182716.252     | 182716.252  | 1.111 | 0.302 |

Note. Type III Sum of Squares

Table 1: Table showing results 3 way repeated measures ANOVA with objects (breaking and non-breaking) and conditions (predicted and surprising) as repeating factors and group as between subject factor.

167 For the experimental session, a *t*-test showed no effect of expectations ( $p = 0.875$ )  
168 on the percentage of correct responses with a mean of 98.6% for predicted and 98.5%  
169 for surprising stimuli, which was anticipated because this is a relatively easy task  
170 where breaking objects always break, intact objects always remain intact. Results  
171 of 3-way repeated measures ANOVA on RTs, on the other hand, show a significant  
172 main effect of conditions (predicted vs surprising,  $p < 0.001$ ), a significant main  
173 effect of objects (breaking vs non-breaking,  $p < 0.05$ ), and a significant interaction  
174 between objects and groups ( $p < 0.01$ ), between objects and conditions ( $p < 0.01$ )  
175 and between objects, groups and conditions ( $p < 0.001$ ). Table 1 reports the detailed  
176 results of the ANOVA.

177 After showing the robustness of main effects and interactions with ANOVA, we  
178 next performed pre-planned tests to answer our main research question, namely

## MATERIAL PROPERTY EXPECTATION

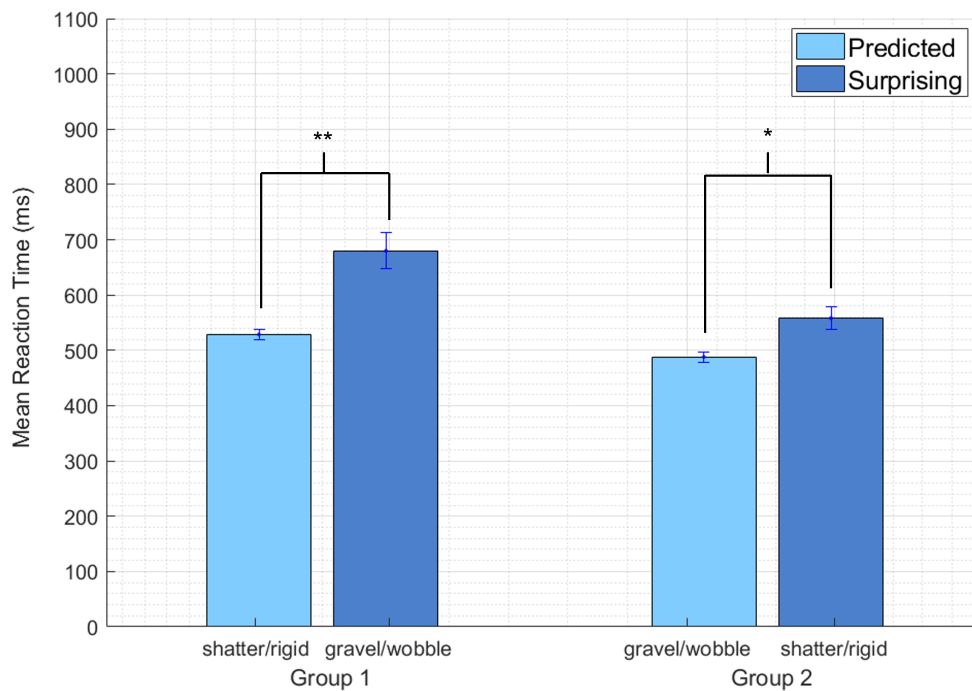

Figure 4: Mean RTs of predicted and surprising conditions averaged across participants (\*\*:  $p < 0.001$ ; \*:  $p < 0.01$ ; error bars: SEM.) When expectations are unmet, whether natural or anomalous, perceptual decisions are delayed.

179 whether unmet expectations delay perceptual decisions. Figure 4 shows the mean  
180 RTs for predicted and surprising conditions. There was a significant difference be-  
181 tween predicted and surprising conditions for both groups (Welch test,  $p < 0.001$  for  
182 group 1,  $p < 0.01$  for group 2). Figure 5 shows the RTs per participant. These results  
183 suggest that observers in both groups take longer to respond under the surprising  
184 condition. Note, however, that this effect tends to be stronger in group 1.

185 Noting that the effect tends to be stronger in group 1, we performed further  
186 analyses. For this, we compared the RTs for breaking and non-breaking objects  
187 separately. Figure 6 shows those RTs. For group 1, the difference between the RTs  
188 under the predicted and surprising conditions was significant for the non-breaking  
189 objects but not for the breaking objects. For group 2 the situation was reversed:  
190 the difference between the RTs under the predicted and surprising conditions was

## MATERIAL PROPERTY EXPECTATION

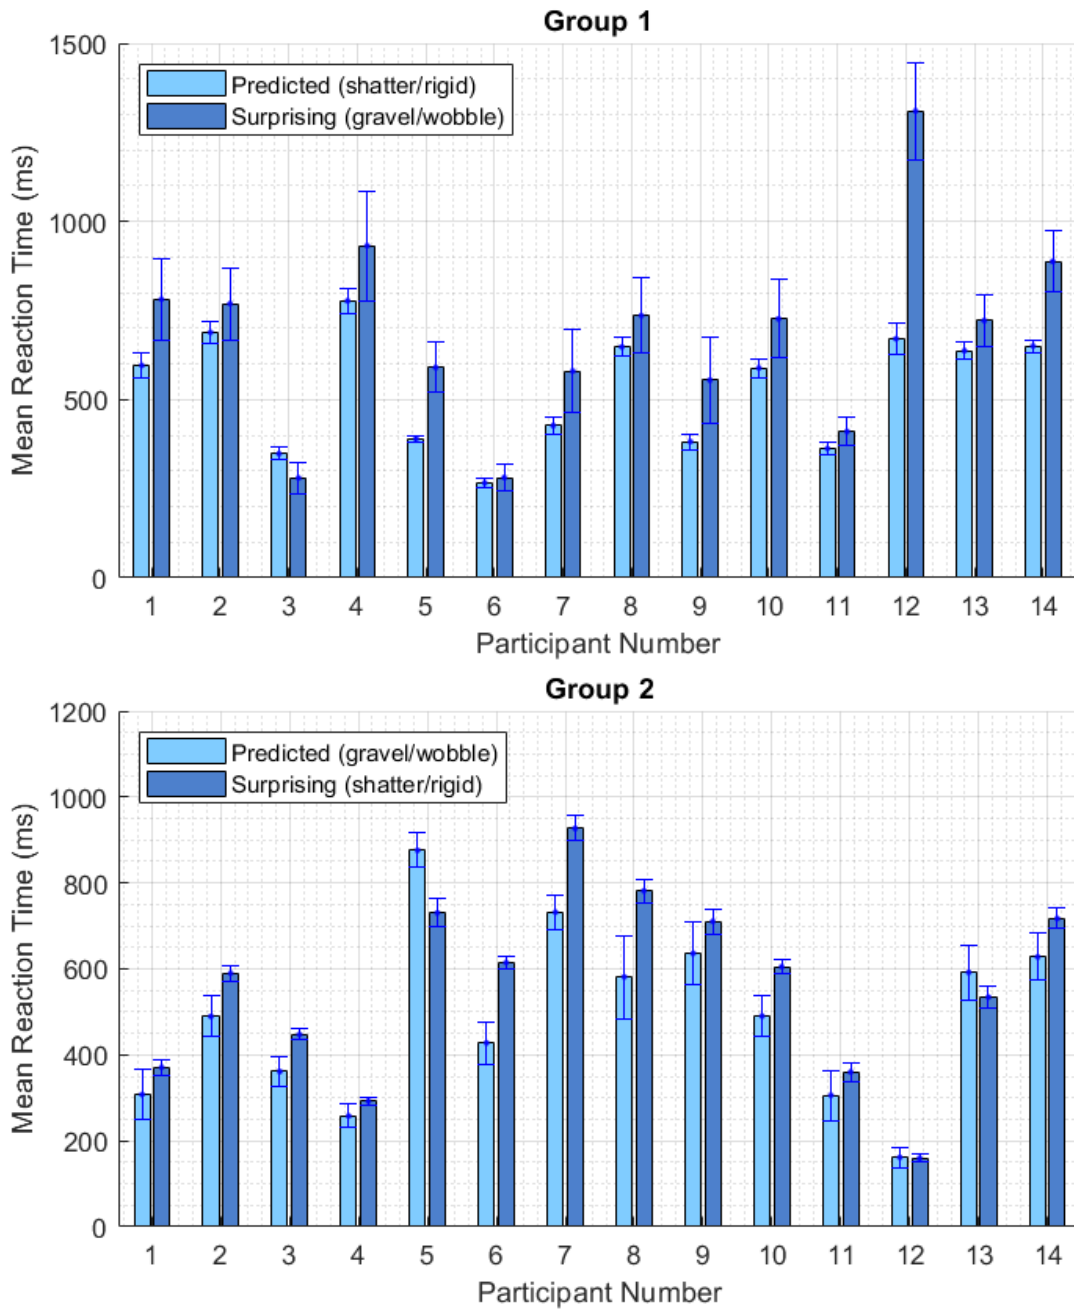

Figure 5: Mean RTs per participant.

## MATERIAL PROPERTY EXPECTATION

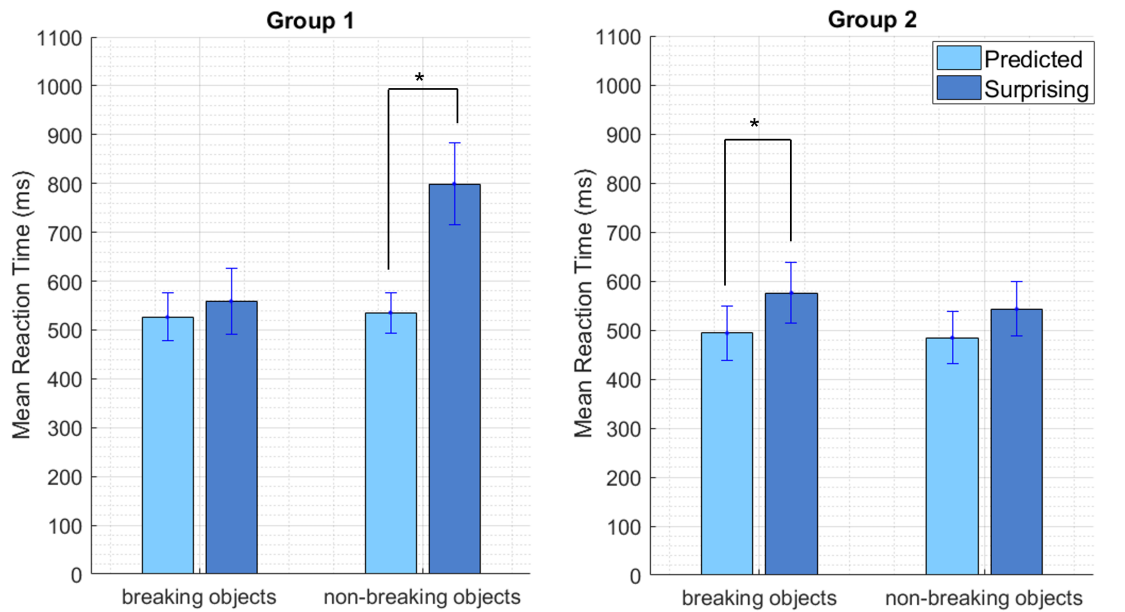

Figure 6: Mean RTs for breaking and non breaking objects plotted separately (\*:  $p < 0.0125$ , corrected for multiple comparisons)

191 significant for the breaking objects but not for the non-breaking objects ( $p < 0.0125$ ,  
192 corrected for multiple comparisons). We discuss this finding below.

## 193 Discussion

194 Here we studied the effect of expectations about material properties on the speed  
195 of relatively low-level perceptual decisions. We presented computer animations of  
196 objects falling down, and asked the participants to report as soon as possible whether  
197 the objects break or not upon hitting the ground. We found that participants were  
198 slower to make this judgment when their expectations about the material properties  
199 were not met. Furthermore, this was true even when participants were trained to  
200 predict an anomalous behavior, for example a candle stick to bounce as if made of  
201 jelly. The pattern of our results can not be explained by motor response prepa-  
202 rations, because whether under the predicted or surprising condition, for a given

## MATERIAL PROPERTY EXPECTATION

203 object the correct response was always the same: breaking objects always broke,  
204 intact objects always remained intact. Motion statistics, on the other hand, might  
205 have affected the RTs. For example it could be easier to decide that an object re-  
206 mains intact with the motion statistics of a rigid body compared to a gelatinous one.  
207 Those low level motion statistics, however, cannot explain the differences between  
208 the two experimental groups. Thus, our results show that unmet expectations about  
209 material properties delay perceptual decisions.

210 **Expectations about material properties affect low-level perceptual pro-**  
211 **cesses.** Our results show that when expectations are not met perceptual deci-  
212 sions are delayed. This is in line with previous studies. For example Alley et al.  
213 (2020) found that unmet expectations delay participants' decisions about material  
214 attributes. But unlike in most previous literature, in our study participants' task  
215 was not about material attributes. Thus they did not need to attend and process  
216 the material properties, they only needed to analyze the motion patterns after the  
217 objects hit the ground. A sensible strategy could be to ignore the object-material  
218 associations, and focus entirely on the low-level motion patterns after the impact.  
219 Nevertheless, participants' expectations about material properties still affected the  
220 speed of their decisions. These results demonstrate that high-level expectations can  
221 affect low-level perceptual processes, even when those expectations are task irrele-  
222 vant.

223 **Training alters expectations.** Our daily subjective experiences suggest that hu-  
224 mans have long term expectations about object-material associations, and static and  
225 dynamic properties of materials. Systematic studies in literature have shown that

## MATERIAL PROPERTY EXPECTATION

226 observers use a variety of visual cues to estimate material properties of objects. For  
227 example, observers use shape, optic and motion cues to judge the stiffness of mate-  
228 rials (Doerschner et al., 2011; Paulun, Schmidt, Assen, & Fleming, 2017; Schmidt,  
229 Paulun, Assen, & Fleming, 2017). These associations not only help us to recognize  
230 and identify the object and materials efficiently but also help in action planning  
231 and guiding our interaction with them (Buckingham et al., 2009; Doerschner et al.,  
232 2011; Sutter, Drewing, & Müsseler, 2014)

233 Some long term expectations are “stubborn” and do not easily change, but some  
234 can be altered under experimental conditions (de Lange, Heilbron, & Kok, 2018;  
235 Yon, de Lange, & Press, 2019). For example, Adams, Graf, and Ernst (2004) showed  
236 that “light from above” prior could be altered when participants are trained with  
237 haptic feedback. Similarly, Sotiropoulos, Seitz, and Seriès (2011) showed that “slow  
238 speed prior”, which explains many motion and direction illusions, can be altered  
239 through training sessions. The pattern of RTs we found in the current study is  
240 consistent with this literature. We found that RTs of group 2 were longer under the  
241 surprising condition compared to the predicted condition, even though the predicted  
242 anomalous behaviors were in conflict with the long term expectations. This shows  
243 that participants learned new context-dependent expectations during the training  
244 session.

245 RT data from the training session provides further insights about the progress of  
246 learning. Firstly, the decrease in RTs was larger for group 2 compared to group 1.  
247 This was anticipated because only in group 2 participants learned new associations  
248 and formed new context-dependent expectations. In the beginning of the training  
249 sessions RTs of group 2 were longer than those of group 1, which is also anticipated



## MATERIAL PROPERTY EXPECTATION

250 because the object behaviors were anomalous and not predicted based on long term  
251 expectations. But as the session progressed the group 2 participants started to learn  
252 to expect an anomalous behavior in the context of the experiment, and their RTs  
253 decreased. Towards the end of the session RTs of group 2 were equal to, and even  
254 slightly lower than RTs of group 1. This further reduction might be related to an  
255 ‘oops’ factor, whereby a sequence of asynchronously presented mismatching cues can  
256 lead to efficient learning (Adams, Kerrigan, & Graf, 2010).

257 **Interplay between long term expectations and context-dependent regu-**  
258 **larities.** The difference between the RTs under the predicted and surprising con-  
259 ditions tended to be larger for group 1 compared to group 2. Thus, the overall  
260 effect of expectations tended to be stronger in group 1 compared to group 2. For  
261 group 1, where long term expectations and context-dependent regularities were con-  
262 sistent, a strong expectation effect was indeed anticipated. Whereas for group 2  
263 long-term expectations, which can often be strong (Seriès & Seitz, 2013), conflicted  
264 the context-dependent regularities. This conflict could have reduced the overall  
265 strength of the newly acquired context-dependent expectations in group 2. Further  
266 scrutiny revealed a significant effect of expectation for intact objects but not for  
267 breaking objects in group 1. Conversely, for group 2 there was a significant effect  
268 for breaking objects but not intact objects. This finding might seem puzzling at  
269 first but it can be explained by different strengths of long term expectations. Long  
270 term expectations for the non-breaking objects used in the experiment, such as the  
271 candle-stick, to be rigid rather than gelatinous might be very strong, leading to the  
272 significant effect found for those objects in group 1. These long term expectations,  
273 however, strongly conflict the context-dependent regularities for group 2, and thus

## MATERIAL PROPERTY EXPECTATION

274 produce weaker new expectations and result in no effect for the non-breaking objects  
275 in that group. Conversely, for the breaking objects used in the experiment, the long  
276 term expectations to shatter might not be that strong, leading to little or no effect  
277 of expectation in group 1. But this time, because the long term expectations are  
278 weak, the newly-acquired expectations are stronger and this results in a significant  
279 effect for group 2.

280 **Bayesian updating.** In this part we discuss a Bayesian updating approach that  
281 can formally explain the pattern of our findings. In its basic form, Bayesian rule  
282 allows computing the posterior distribution of the world states given the observa-  
283 tion by simply combining the prior probability distribution of the world states (*i.e.*  
284 the expectations) and the likelihood function of those world states under the ob-  
285 served data. This process can be dynamic, for example the posterior computed  
286 at one moment can be used as the prior of the next (Bitzer, Park, Blankenburg,  
287 & Kiesel, 2014; Urgen & Boyaci, 2021). This is called Bayesian updating of the  
288 posterior. The conceptual ideas provided above to explain our findings can be for-  
289 mulated in such an updating model. In such a model, computations in a trial would  
290 continue until enough evidence is collected to reach a decision, which is breaking  
291 versus non-breaking in our experiment. In case initial prior and the likelihood agree,  
292 this computation can reach a decision relatively quickly, because the posterior dis-  
293 tribution would be sharp and clearly favor one of the world states. Whereas if the  
294 prior and likelihood disagree, posterior distribution would become broader making  
295 it harder to make a decision, and the computation would need to continue. For ex-  
296 ample, for group 2 in the beginning of the training session the prior distribution and  
297 the likelihood function largely disagree, thus the model would predict longer RTs

## MATERIAL PROPERTY EXPECTATION

298 consistent with the empirical data. But as the priors are updated, the discrepancy  
299 between them reduces, thus in later trials computations would converge quicker and  
300 the model would predict shorter RTs, again consistent with the empirical data. The  
301 same logic applies to the trials in the experimental session. In short, a Bayesian  
302 updating approach can formally explain the empirical findings of the current study.

## 303 Conclusion

304 To conclude, we found that unmet expectations about dynamic material proper-  
305 ties delay perceptual decisions. We argue that high-level expectations about material  
306 properties affect relatively low-level perceptual processes even when those expecta-  
307 tions are not directly task-relevant. Furthermore, we show that through training par-  
308 ticipants form new context-dependent expectations. Those newly formed context-  
309 dependent expectations and long term expectations together shape the perceptual  
310 processes, which can be formulated using a Bayesian updating approach.

## 311 References

- 312 Adams, W. J., Graf, E. W., & Ernst, M. O. (2004). Experience can change  
313 the 'light-from-above' prior. *Nature Neuroscience*, 7(10), 1057–1058. doi:  
314 10.1038/nn1312
- 315 Adams, W. J., Kerrigan, I. S., & Graf, E. W. (2010). Efficient visual recalibration  
316 from either visual or haptic feedback: the importance of being wrong. *Journal*  
317 *of Neuroscience*, 30(44), 14745–14749.

## MATERIAL PROPERTY EXPECTATION

- 318 Alley, L. M., Schmid, A. C., & Doerschner, K. (2020). Expectations affect  
319 the perception of material properties. *Journal of Vision*, *20*(12), 1. doi:  
320 10.1167/jov.20.12.1
- 321 Bitzer, S., Park, H., Blankenburg, F., & Kiebel, S. J. (2014). Perceptual decision  
322 making: drift-diffusion model is equivalent to a Bayesian model. *Frontiers in*  
323 *human neuroscience*, *8*(February), 102:1–17. doi: 10.3389/fnhum.2014.00102
- 324 Brainard, D. H. (1997). The Psychophysics Toolbox. *Spatial Vision*, *10*, 433-436.
- 325 Buckingham, G., Cant, J., & Goodale, M. (2009). Living in a material world:  
326 How visual cues to material properties affect the way that we lift objects  
327 and perceive their weight. *Journal of neurophysiology*, *102*, 3111-8. doi:  
328 10.1152/jn.00515.2009
- 329 de Lange, F. P., Heilbron, M., & Kok, P. (2018). How Do Expectations  
330 Shape Perception? *Trends in Cognitive Sciences*, *22*(9), 764–779. doi:  
331 10.1016/j.tics.2018.06.002
- 332 Doerschner, K., Fleming, R. W., Yilmaz, O., Schrater, P. R., Hartung, B., & Ker-  
333 sten, D. (2011). Visual motion and the perception of surface material. *Current*  
334 *Biology*, *21*(23), 2010–2016.
- 335 Fleming, R., Wiebel, C., & Gegenfurtner, K. (2013). Perceptual qualities and  
336 material classes. *Journal of Vision*, *13*. doi: 10.1167/13.8.9
- 337 JASP Team. (2022). *JASP (Version 0.16.3)[Computer software]*. Retrieved from  
338 <https://jasp-stats.org/>
- 339 Kersten, D., Mamassian, P., & Yuille, A. (2004). Object perception as bayesian  
340 inference. *Annual review of psychology*, *55*, 271-304. doi: 10.1146/an-  
341 nurev.psych.55.090902.142005

## MATERIAL PROPERTY EXPECTATION

- 342 Kveraga, K., Avniel, G., & Bar, M. (2007). Top-down predictions in the cognitive  
343 brain. *Brain and cognition*, *65*, 145-68. doi: 10.1016/j.bandc.2007.06.007
- 344 Paulun, V., Schmidt, F., Assen, J., & Fleming, R. (2017). Shape, motion, and  
345 optical cues to stiffness of elastic objects. *Journal of Vision*, *17*(1), 1-22. doi:  
346 10.1167/17.1.20
- 347 Schmidt, F., Paulun, V., Assen, J., & Fleming, R. (2017). Inferring the stiffness of  
348 unfamiliar objects from optical, shape, and motion cues. *Journal of Vision*,  
349 *17*(3), 1-17. doi: 10.1167/17.3.18
- 350 Seriès, P., & Seitz, A. (2013). Learning what to expect (in visual perception).  
351 *Frontiers in human neuroscience*, *7*, 668.
- 352 Sotiropoulos, G., Seitz, A. R., & Seriès, P. (2011). Changing expectations about  
353 speed alters perceived motion direction. *Current Biology*, *21*(21), R883–R884.
- 354 Stein, T., & Peelen, M. (2015). Content-specific expectations enhance stimulus  
355 detectability by increasing perceptual sensitivity. *Journal of experimental psy-*  
356 *chology. General*, *144*. doi: 10.1037/xge0000109
- 357 Summerfield, C., & de Lange, F. (2014). Expectation in perceptual decision making:  
358 Neural and computational mechanisms. *Nature reviews. Neuroscience*, *15*. doi:  
359 10.1038/nrn3838
- 360 Sutter, C., Drewing, K., & Müsseler, J. (2014). *Multisensory integration in action*  
361 *control* (Vol. 5). Frontiers Media SA.
- 362 Urgen, B. M., & Boyaci, H. (2021). Unmet expectations delay sensory processes.  
363 *Vision Research*, *181*, 1–9. doi: 10.1016/j.visres.2020.12.004
- 364 Wyart, V., Nobre, A., & Summerfield, C. (2012). Dissociable prior influences of  
365 signal probability and relevance on visual contrast sensitivity. *Proceedings*

## MATERIAL PROPERTY EXPECTATION

366 *of the National Academy of Sciences of the United States of America, 109,*

367 3593-8. doi: 10.1073/pnas.1120118109

368 Yon, D., de Lange, F. P., & Press, C. (2019). The Predictive Brain as

369 a Stubborn Scientist. *Trends in Cognitive Sciences, 23*(1), 6–8. doi:

370 10.1016/j.tics.2018.10.003
